# Supplementary material
Source: publisher figshare collection journal article supplement (https://karger.figshare.com/articles/dataset/_/5121310)
Supplement: Supplementary file 1 [file 1 › 000318704_sm_Questionnaire.pdf]

**GLOFAL**  
**Questionnaire for Allergic Diseases**  
**Multi-Centre Study**

**Date** : \_\_\_\_/\_\_\_\_/\_\_\_\_ **Country:** *GHANA*

**Name of Interviewer** : \_\_\_\_\_

**Name of Recorder** : \_\_\_\_\_

**A. Child's details**

1. Name / ID number : \_\_\_\_\_/\_\_\_\_\_

2. Date of birth / Age : \_\_\_\_/\_\_\_\_/\_\_\_\_ [ ] year(s)

3. Place of Birth ( including Region): \_\_\_\_\_

[Country IF NOT Ghana]: \_\_\_\_\_

4. Ethnicity: \_\_\_\_\_

[Country of Origin IF NOT Ghana]: \_\_\_\_\_

5. Sex : [ ] Male [ ] Female

6. What is the position of this child in sib-ship? : \_\_\_\_\_ of \_\_\_\_\_ children

7. School information

Class : \_\_\_\_\_

Name of school : \_\_\_\_\_  
\_\_\_\_\_

8. House information

House Number : \_\_\_\_\_

Suburb/ Area : \_\_\_\_\_

Telephone : \_\_\_\_\_

GPS Readings

a. Latitude : \_\_\_\_\_

b. Longitude : \_\_\_\_\_

c. Altitude : \_\_\_\_\_

9. How far is the school from home (GPS reading)? : \_\_\_\_\_ Km

10. How does the child get to school most of the time?

- ☐ **Walk**  
☐ **Bicycle**  
☐ **Taxi**  
☐ **Bus / Troto**  
☐ **Private Car**  
☐ **Other, please specify** \_\_\_\_\_

## B. Socio-economic Status and Environmental Factors.

1. Has the child lived in this town/village since he/she was born? ☐ **Yes** ☐ **No**

2. If you answered “no” where has the child lived before and for how long?

**Area A In.** \_\_\_\_\_ **for** \_\_\_\_\_ **month(s)** \_\_\_\_\_ **Year(s)**

**Area B In.** \_\_\_\_\_ **for** \_\_\_\_\_ **month(s)** \_\_\_\_\_ **Year(s)**

**Area C In.** \_\_\_\_\_ **for** \_\_\_\_\_ **month(s)** \_\_\_\_\_ **Year(s)**

**Area D In.** \_\_\_\_\_ **for** \_\_\_\_\_ **month(s)** \_\_\_\_\_ **Year(s)**

3. Who provides financially for this child?

- ☐ **Father and Mother**  
☐ **Father**  
☐ **Mother**  
☐ **Other, please specify:** \_\_\_\_\_

4. Occupation of person in question number 3: \_\_\_\_\_

Occupation of the spouse of this person: \_\_\_\_\_

5. The highest level of formal education completed by:

Person (question number 3)

- ☐ **Primary/Elementary** ☐ **Middle school** ☐ **JSS** ☐ **SSS** ☐ **O’level**  
☐ **A’ level** ☐ **Vocational/ Commercial** ☐ **Training College**  
☐ **Polytechnic/University**  
☐ **Other, please specify** \_\_\_\_\_

Spouse of this person

- ☐ **Primary/Elementary** ☐ **Middle school** ☐ **JSS** ☐ **SSS** ☐ **O’ level**  
☐ **A’ level** ☐ **Vocational/ Commercial** ☐ **Training College**  
☐ **Polytechnic/University**  
☐ **Other, please specify** \_\_\_\_\_

6. Who does this child live with (if different from response in question “3” above)?

- ☐ **Father and Mother**  
☐ **Father**  
☐ **Mother**  
☐ **Other, please specify:** \_\_\_\_\_

7. Occupation of person in question number 6: \_\_\_\_\_

Occupation of the spouse of this person: \_\_\_\_\_

8. The highest level of formal education completed by:  
Person (question number 6)  
☐ **Primary/Elementary**   ☐ **Middle school**   ☐ **JSS**   ☐ **SSS**   ☐ **O'level**  
☐ **A' level**   ☐ **Vocational/ Commercial**   ☐ **Training College**  
☐ **Polytechnic/University**  
☐ **Other, please specify** \_\_\_\_\_

Spouse of this person  
☐ **Primary/Elementary**   ☐ **Middle school**   ☐ **JSS**   ☐ **SSS**   ☐ **O'level**  
☐ **A' level**   ☐ **Vocational/ Commercial**   ☐ **Training College**  
☐ **Polytechnic/University**  
☐ **Other, please specify** \_\_\_\_\_

9. The house in which the child lives is made primarily of :  
☐ **Cement**   ☐ **Wood**   ☐ **Mud**   ☐ **Other, please specify** \_\_\_\_\_

10. What is the main source of water supply to the home?  
☐ **Pipe-borne**   ☐ **Tanker (treated)**   ☐ **Tanker (untreated)**  
☐ **River/ Stream**   ☐ **Well/ Borehole**  
☐ **Other, please specify** \_\_\_\_\_

11. What is the type of toilet in the home?  
☐ **Indoor WC**   ☐ **Compound latrine**   ☐ **Public latrine**  
☐ **Other, please specify** \_\_\_\_\_

12. The fuel **mostly** used at home for cooking is( *tick one*):  
☐ **LPG**   ☐ **Electricity**   ☐ **Charcoal**   ☐ **Firewood**  
☐ **Kerosene**   ☐ **Other** \_\_\_\_\_

13. What kind of accommodation does the child live in?  
☐ **Detached house**   ☐ **Semi-detached**   ☐ **Flat**  
☐ **Compound house**   ☐ **Other, please specify** \_\_\_\_\_

14. How much money did your family spend on electricity in the past month?

¢ \_\_\_\_\_  
☐ **Respondent unable to estimate**

15. How much money did your family spend on food in the past month?

¢ \_\_\_\_\_  
☐ **Respondent unable to estimate**

## C. ISAAC Core Questionnaires

### C1 Core Questionnaire for Wheezing and Asthma

*All questions are about problems which occur when this child **DOES NOT** have a cold or the flu*

1. Has this child ever had wheezing or whistling in the chest? ☐ **Yes** ☐ **No**

IF YOU HAVE ANSWERED "NO" PLEASE SKIP TO QUESTION 6

2. Has this child had wheezing or whistling in the chest in the past 12 months?  
☐ **Yes** ☐ **No**

IF YOU HAVE ANSWERED "NO" PLEASE SKIP TO QUESTION 6

3. How many attacks of wheezing has this child had in the past 12 months?  
☐ **None**  
☐ **1-3**  
☐ **4-12**  
☐ **> 12**

4. In the past 12 months how often, on average, has this child's sleep been disturbed due to wheezing?  
☐ **Never woken with wheezing**  
☐ **Less than one night per week**  
☐ **One or more nights per week**

5. In the past 12 months, has wheezing ever been severe enough to limit this child's speech to only one or two words at a time between breaths? ☐ **Yes** ☐ **No**

6. In the past 12 months, has this child's chest sounded wheezy during or after exercise? ☐ **Yes** ☐ **No**

7. In the past 12 months, has this child had a dry cough ***at night***, apart from a cough associated with a cold or chest infection? ☐ **Yes** ☐ **No**

8. Has a doctor ever diagnosed your child as having asthma? ☐ **Yes** ☐ **No**

9. If yes to question number 8, what is the name of the medicine(s) the doctor gave to your child?

Medicine(s) \_\_\_\_\_  
☐ **Cannot recall name of medicine**

10. Has any member of this child's family ever had asthma?

☐ **Yes** ☐ **No** ☐ **No idea**

11. If you answered "yes" to question 10, indicate relationship to child (*tick all that apply*)

☐ **Father**

☐ **Mother**

☐ **Brother or Sister**

☐ **Father's** \_\_\_\_\_ (family member eg. sister, father)

☐ **Mother's** \_\_\_\_\_ (family member eg. sister, father)

## C2 Core Questionnaire for Rhinitis/Hayfever

*All questions are about problems which occur when this child **DOES NOT** have a cold or the flu.*

1. Has this child ever had a problem with sneezing or a runny or blocked nose (nose problem) without cold or the flu? ☐ Yes ☐ No

IF YOU HAVE ANSWERED "NO" PLEASE SKIP TO QUESTION 6

2. Has this child had this nose problem in the past 12 months? ☐ Yes ☐ No

IF YOU HAVE ANSWERED "NO" PLEASE SKIP TO QUESTION 6

3. In the past 12 months, has this child's nose problem been associated with itchy-watery eyes? ☐ Yes ☐ No

4. In which of the past 12 months did this nose problem occur? (please tick any which apply)

- |                                   |                                    |                                       |
|-----------------------------------|------------------------------------|---------------------------------------|
| <input type="checkbox"/> January  | <input type="checkbox"/> June      | <input type="checkbox"/> November     |
| <input type="checkbox"/> February | <input type="checkbox"/> July      | <input type="checkbox"/> December     |
| <input type="checkbox"/> March    | <input type="checkbox"/> August    | <input type="checkbox"/> Rainy season |
| <input type="checkbox"/> April    | <input type="checkbox"/> September | <input type="checkbox"/> Dry season   |
| <input type="checkbox"/> May      | <input type="checkbox"/> October   | <input type="checkbox"/> Anytime      |
|                                   |                                    | <input type="checkbox"/> No idea      |

5. In the past 12 months, how much did this nose problem interfere with this child's daily activities such as school or play?

- ☐ Not at all  
☐ A little  
☐ A Moderate  
☐ A lot

6. Has a doctor ever diagnosed your child as having allergic rhinitis / hay fever?

☐ Yes ☐ No

7. If "Yes" to question number 6, what is the name of medicine the doctor gave your child?

Medicine(s) \_\_\_\_\_  
☐ Cannot recall name of medicine

8. Has any member of this child's family ever had allergic rhinitis / hay fever?

☐ Yes ☐ No ☐ No idea

9. If you answered "yes" to question 8, indicate relationship to child (*tick all that apply*)

- ☐ Father  
☐ Mother  
☐ Brother or Sister  
☐ Father's \_\_\_\_\_ (family member eg. sister, father)  
☐ Mother's \_\_\_\_\_ (family member eg. sister, father)

### C3 Core Questionnaire for Atopic Dermatitis/Eczema

*Show pictures from the “Observer’s protocol for recording signs of visible flexural dermatitis” to the respondent*

1. Has this child ever had one or more skin problem(s) like in the pictures accompanied by an itchy rash which was coming and going for at least 6 months?  
[ ] **Yes, Picture number**\_\_ \_\_ \_\_ \_\_ [ ] **No**

IF YOU HAVE ANSWERED "NO" PLEASE SKIP TO QUESTION 6

2. Has this child ever had this skin problem (itchy rash) in the last 12 months?  
[ ] **Yes** [ ] **No**

IF YOU HAVE ANSWERED "NO" PLEASE SKIP TO QUESTION 6

3. Has this skin problem (itchy rash) at any time affected any of the following places: The folds of this child’s elbows, behind the knees, in front of ankles, under the buttocks or around the neck, ears or eyes?  
[ ] **Yes** [ ] **No**
4. How often, on average, has this child been kept awake at night by this itchy rash?  
[ ] **Never in the past 12 months**  
[ ] **Less than one night per week**  
[ ] **One or more nights per week**
5. Did this rash clear completely at any time during the past 12 months?  
[ ] **Yes** [ ] **No**
6. Has a doctor ever diagnosed your child as having allergic eczema/ atopic dermatitis?  
[ ] **Yes** [ ] **No**
7. If yes to question number 5, what is the name of the medicine(s) the doctor gave to your child?  
Medicine(s) \_\_ \_\_ \_\_ \_\_ \_\_ \_\_ \_\_ \_\_ \_\_ \_\_ \_\_ \_\_ \_\_ \_\_ \_\_ \_\_ \_\_ \_\_ \_\_ \_\_ \_\_ \_\_  
[ ] **Cannot recall name of medicine**
8. Has any member of this child’s family ever had allergic eczema/ atopic dermatitis?  
[ ] **Yes** [ ] **No** [ ] **No idea**

9. If you answered “yes” to question 8, indicate relationship to child (*tick all that apply*)  
[ ] **Father**  
[ ] **Mother**  
[ ] **Brother or Sister**  
[ ] **Father’s** \_\_ \_\_ \_\_ \_\_ \_\_ \_\_ \_\_ \_\_ \_\_ \_\_ \_\_ \_\_ \_\_ \_\_ \_\_ \_\_ \_\_ \_\_ \_\_ \_\_ \_\_ \_\_ (family member eg. sister, father)  
[ ] **Mother’s** \_\_ \_\_ \_\_ \_\_ \_\_ \_\_ \_\_ \_\_ \_\_ \_\_ \_\_ \_\_ \_\_ \_\_ \_\_ \_\_ \_\_ \_\_ \_\_ \_\_ \_\_ \_\_ (family member eg. sister, father)

## D. Health concerns

1. When was the last time this child had any medical treatment?  
☐ < 1 month ago                      ☐ 1 to 3 months ago  
☐ 3 to 6 months ago                      ☐ > 6 months
2. What was the name of the medicine in '1' and for which condition was it given?  
**Medicine1** \_\_\_\_\_ **Condition1** \_\_\_\_\_  
  
**Medicine2** \_\_\_\_\_ **Condition2** \_\_\_\_\_  
  
**Medicine3** \_\_\_\_\_ **Condition3** \_\_\_\_\_
3. When did this child last have treatment for worm infection?  
☐ < 1 month ago                      ☐ 1 to 3 months ago  
☐ 3 to 6 months ago                      ☐ > 6 months  
☐ No idea
4. What was the name of the medicine used when this child was last treated for worm infection? \_\_\_\_\_  
☐ Cannot recall name of medicine
5. Is there any smoker in your house ☐ Yes              ☐ No
6. If you answered "yes" to question 5, does this person smoke when the child is present? ☐ Yes              ☐ No
7. Is this child exposed to tobacco smoke outside your home?  
☐ Yes              ☐ No              ☐ No idea
8. Do you use groundnut oil for any other purpose (example as skin ointment)?  
☐ Yes              ☐ No

## E. Diet

**For this section,** please ask the respondent how frequently **the child** consumes each food item and the cooking method used to prepare the food item.

| FOOD ITEM                         | FREQUENCY OF CONSUMPTION |                                 |                                  |                                   |              | COOKING METHOD               |               |                                            |              |
|-----------------------------------|--------------------------|---------------------------------|----------------------------------|-----------------------------------|--------------|------------------------------|---------------|--------------------------------------------|--------------|
|                                   | <i>Daily</i>             | <i>1x weekly<br/>(at least)</i> | <i>1x monthly<br/>(at least)</i> | <i>Every half year (at least)</i> | <i>Never</i> | <i>Boiling/<br/>Steaming</i> | <i>Frying</i> | <i>Smoking/<br/>Grilling/<br/>Roasting</i> | <i>Other</i> |
| <b><i>Staples</i></b>             |                          |                                 |                                  |                                   |              |                              |               |                                            |              |
| Rice                              | [ ]                      | [ ]                             | [ ]                              | [ ]                               | [ ]          | [ ]                          | [ ]           | [ ]                                        | _____        |
| Cassava                           | [ ]                      | [ ]                             | [ ]                              | [ ]                               | [ ]          | [ ]                          | [ ]           | [ ]                                        | _____        |
| Plantain                          | [ ]                      | [ ]                             | [ ]                              | [ ]                               | [ ]          | [ ]                          | [ ]           | [ ]                                        | _____        |
| Yam                               | [ ]                      | [ ]                             | [ ]                              | [ ]                               | [ ]          | [ ]                          | [ ]           | [ ]                                        | _____        |
| Maize/ Corn                       | [ ]                      | [ ]                             | [ ]                              | [ ]                               | [ ]          | [ ]                          | [ ]           | [ ]                                        | _____        |
| Other                             | [ ]                      | [ ]                             | [ ]                              | [ ]                               | [ ]          | [ ]                          | [ ]           | [ ]                                        | _____        |
| <b><i>Meat/Protein Source</i></b> |                          |                                 |                                  |                                   |              |                              |               |                                            |              |
| Cattle (Beef)                     | [ ]                      | [ ]                             | [ ]                              | [ ]                               | [ ]          | [ ]                          | [ ]           | [ ]                                        | _____        |
| Sheep (Mutton)                    | [ ]                      | [ ]                             | [ ]                              | [ ]                               | [ ]          | [ ]                          | [ ]           | [ ]                                        | _____        |
| Goat (Chevron)                    | [ ]                      | [ ]                             | [ ]                              | [ ]                               | [ ]          | [ ]                          | [ ]           | [ ]                                        | _____        |
| Pig (Pork)                        | [ ]                      | [ ]                             | [ ]                              | [ ]                               | [ ]          | [ ]                          | [ ]           | [ ]                                        | _____        |
| Chicken                           | [ ]                      | [ ]                             | [ ]                              | [ ]                               | [ ]          | [ ]                          | [ ]           | [ ]                                        | _____        |
| Fish                              | [ ]                      | [ ]                             | [ ]                              | [ ]                               | [ ]          | [ ]                          | [ ]           | [ ]                                        | _____        |
| Other_____                        | [ ]                      | [ ]                             | [ ]                              | [ ]                               | [ ]          | [ ]                          | [ ]           | [ ]                                        | _____        |
| Shellfish (Crab, shrimp etc)      | [ ]                      | [ ]                             | [ ]                              | [ ]                               | [ ]          | [ ]                          | [ ]           | [ ]                                        | _____        |
| Snail                             | [ ]                      | [ ]                             | [ ]                              | [ ]                               | [ ]          | [ ]                          | [ ]           | [ ]                                        | _____        |
| Mushroom                          | [ ]                      | [ ]                             | [ ]                              | [ ]                               | [ ]          | [ ]                          | [ ]           | [ ]                                        | _____        |
| Beans                             | [ ]                      | [ ]                             | [ ]                              | [ ]                               | [ ]          | [ ]                          | [ ]           | [ ]                                        | _____        |
| Eggs                              | [ ]                      | [ ]                             | [ ]                              | [ ]                               | [ ]          | [ ]                          | [ ]           | [ ]                                        | _____        |
| Other_____                        | [ ]                      | [ ]                             | [ ]                              | [ ]                               | [ ]          | [ ]                          | [ ]           | [ ]                                        | _____        |

| FOOD ITEM                                                   | FREQUENCY OF CONSUMPTION |                                 |                                  |                                       |              | COOKING METHOD               |               |                                            |              |
|-------------------------------------------------------------|--------------------------|---------------------------------|----------------------------------|---------------------------------------|--------------|------------------------------|---------------|--------------------------------------------|--------------|
|                                                             | <i>Daily</i>             | <i>1x weekly<br/>(at least)</i> | <i>1x monthly<br/>(at least)</i> | <i>Every half<br/>year (at least)</i> | <i>Never</i> | <i>Boiling/<br/>Steaming</i> | <i>Frying</i> | <i>Smoking/<br/>Grilling/<br/>Roasting</i> | <i>Other</i> |
| <b><i>Industrially processed oils</i></b>                   |                          |                                 |                                  |                                       |              |                              |               |                                            |              |
| Cooking oil (e.g. Frytol, Palmin)                           | [ ]                      | [ ]                             | [ ]                              | [ ]                                   | [ ]          | [ ]                          | [ ]           | [ ]                                        | _____        |
| Other_____                                                  | [ ]                      | [ ]                             | [ ]                              | [ ]                                   | [ ]          | [ ]                          | [ ]           | [ ]                                        | _____        |
| <b><i>Home-made oils</i></b>                                |                          |                                 |                                  |                                       |              |                              |               |                                            |              |
| Palm oil                                                    | [ ]                      | [ ]                             | [ ]                              | [ ]                                   | [ ]          | [ ]                          | [ ]           | [ ]                                        | _____        |
| Palm Kernel oil                                             | [ ]                      | [ ]                             | [ ]                              | [ ]                                   | [ ]          | [ ]                          | [ ]           | [ ]                                        | _____        |
| Coconut Oil                                                 | [ ]                      | [ ]                             | [ ]                              | [ ]                                   | [ ]          | [ ]                          | [ ]           | [ ]                                        | _____        |
| Groundnut oil                                               | [ ]                      | [ ]                             | [ ]                              | [ ]                                   | [ ]          | [ ]                          | [ ]           | [ ]                                        | _____        |
| Shea Butter                                                 | [ ]                      | [ ]                             | [ ]                              | [ ]                                   | [ ]          | [ ]                          | [ ]           | [ ]                                        | _____        |
| Other_____                                                  | [ ]                      | [ ]                             | [ ]                              | [ ]                                   | [ ]          | [ ]                          | [ ]           | [ ]                                        | _____        |
|                                                             |                          |                                 |                                  |                                       |              |                              |               |                                            |              |
| Evaporated Milk (eg. Ideal)                                 | [ ]                      | [ ]                             | [ ]                              | [ ]                                   | [ ]          | [ ]                          | [ ]           | [ ]                                        | _____        |
| Powdered Milk ( eg Nido )                                   | [ ]                      | [ ]                             | [ ]                              | [ ]                                   | [ ]          | [ ]                          | [ ]           | [ ]                                        | _____        |
| Margarine (e.g. Blue Band)                                  | [ ]                      | [ ]                             | [ ]                              | [ ]                                   | [ ]          | [ ]                          | [ ]           | [ ]                                        | _____        |
| Cheese/Butter (e.g. Even, Laughing Cow)                     | [ ]                      | [ ]                             | [ ]                              | [ ]                                   | [ ]          | [ ]                          | [ ]           | [ ]                                        | _____        |
| Ice-cream/ Yoghurt (e.g. Fanice or FanYogo)                 | [ ]                      | [ ]                             | [ ]                              | [ ]                                   | [ ]          | [ ]                          | [ ]           | [ ]                                        | _____        |
| Groundnuts/ Peanuts                                         | [ ]                      | [ ]                             | [ ]                              | [ ]                                   | [ ]          | [ ]                          | [ ]           | [ ]                                        | _____        |
| Pastries (e.g. Cakes, pies, )                               | [ ]                      | [ ]                             | [ ]                              | [ ]                                   | [ ]          | [ ]                          | [ ]           | [ ]                                        | _____        |
| Fresh fruits (e.g., orange)                                 | [ ]                      | [ ]                             | [ ]                              | [ ]                                   | [ ]          | [ ]                          | [ ]           | [ ]                                        | _____        |
| Fresh vegetables ( e.g. salads, fresh ground pepper sauce ) | [ ]                      | [ ]                             | [ ]                              | [ ]                                   | [ ]          | [ ]                          | [ ]           | [ ]                                        | _____        |

## F. Food Allergy

The following questions are about the child's reactions to food OTHER than reactions caused by food poisoning, illness or a bacterial infection such as cholera etc.

1. Has your child ever had adverse events (reactions) after food intake?  
[ ] Yes [ ] No

If yes which food? \_\_\_\_\_  
\_\_\_\_\_

(Show list in **Table F2** if needed)

2. Has the child had any problems eating any other food or foods that not listed in **Table F2**? If yes please list:

\_\_\_\_\_  
\_\_\_\_\_

IF YOU HAVE ANSWERED "NO" TO QUESTION 1 & 2 PLEASE SKIP TO QUESTION 13

3. How old was the child when s/he had the first problem eating this food?  
\_\_\_\_\_ year(s)

4. How old was the child when s/he had the most recent problem eating this food?  
\_\_\_\_\_ year(s)

5. Has the child had this illness or trouble after eating this food?

[ ] **Only once**

[ ] **2-4 times**

[ ] **More than 4 times**

6. Has the child avoided eating that food since the illness or trouble?

[ ] Yes [ ] No

7. Did this illness or trouble include any of the following? (please mark if yes)

**Table F1**

|                                                            | Yes | No |
|------------------------------------------------------------|-----|----|
| Itching, tingling or swelling in the mouth, lips or throat |     |    |
| A rash, nettle sting-like rash or itchy skin               |     |    |
| Diarrhoea or vomiting (other than food poisoning)          |     |    |
| Runny or stuffy nose                                       |     |    |
| Red, sore or running eyes                                  |     |    |
| Difficulty swallowing                                      |     |    |
| Breathlessness                                             |     |    |
| Stiffness in your joints                                   |     |    |
| Fainting or dizziness                                      |     |    |
| Headaches                                                  |     |    |

8. Has the child had any other symptoms? ☐ Yes ☐ No

If yes, please describe \_\_\_\_\_

9. How long after eating the food did the child start having the first symptom?

☐ Minutes ☐ Hours ☐ Days

10. How long did it last? ☐ Minutes ☐ Hours ☐ Days

11. Did the child receive any treatment? ☐ Yes ☐ No

12. If yes for question number 11, what was the name of medicine given?

\_\_\_\_\_

13. Have you ever been told by a doctor that the child has a food allergy?

☐ Yes ☐ No

14. Say approximately how often the child eats the following foods, and whether or not s/he avoids them because they make him/her ill:

**Table F2**

| Food         | Any Reaction             |                          | How often does the child eat this food (in season)<br><i>Tick one column only</i> |                          |                          |                          |                          | Does the child avoid this food because it makes him/her ill? |                          |
|--------------|--------------------------|--------------------------|-----------------------------------------------------------------------------------|--------------------------|--------------------------|--------------------------|--------------------------|--------------------------------------------------------------|--------------------------|
|              | Yes                      | No                       | Most Days                                                                         | Most weeks               | Most months              | Rarely                   | Never                    | Yes                                                          | No                       |
| Cow's milk   | <input type="checkbox"/> | <input type="checkbox"/> | <input type="checkbox"/>                                                          | <input type="checkbox"/> | <input type="checkbox"/> | <input type="checkbox"/> | <input type="checkbox"/> | <input type="checkbox"/>                                     | <input type="checkbox"/> |
| Hen's eggs   | <input type="checkbox"/> | <input type="checkbox"/> | <input type="checkbox"/>                                                          | <input type="checkbox"/> | <input type="checkbox"/> | <input type="checkbox"/> | <input type="checkbox"/> | <input type="checkbox"/>                                     | <input type="checkbox"/> |
| Fish         | <input type="checkbox"/> | <input type="checkbox"/> | <input type="checkbox"/>                                                          | <input type="checkbox"/> | <input type="checkbox"/> | <input type="checkbox"/> | <input type="checkbox"/> | <input type="checkbox"/>                                     | <input type="checkbox"/> |
| Shrimp       | <input type="checkbox"/> | <input type="checkbox"/> | <input type="checkbox"/>                                                          | <input type="checkbox"/> | <input type="checkbox"/> | <input type="checkbox"/> | <input type="checkbox"/> | <input type="checkbox"/>                                     | <input type="checkbox"/> |
| Groundnuts   | <input type="checkbox"/> | <input type="checkbox"/> | <input type="checkbox"/>                                                          | <input type="checkbox"/> | <input type="checkbox"/> | <input type="checkbox"/> | <input type="checkbox"/> | <input type="checkbox"/>                                     | <input type="checkbox"/> |
| Pineapple    | <input type="checkbox"/> | <input type="checkbox"/> | <input type="checkbox"/>                                                          | <input type="checkbox"/> | <input type="checkbox"/> | <input type="checkbox"/> | <input type="checkbox"/> | <input type="checkbox"/>                                     | <input type="checkbox"/> |
| Banana       | <input type="checkbox"/> | <input type="checkbox"/> | <input type="checkbox"/>                                                          | <input type="checkbox"/> | <input type="checkbox"/> | <input type="checkbox"/> | <input type="checkbox"/> | <input type="checkbox"/>                                     | <input type="checkbox"/> |
| Apple        | <input type="checkbox"/> | <input type="checkbox"/> | <input type="checkbox"/>                                                          | <input type="checkbox"/> | <input type="checkbox"/> | <input type="checkbox"/> | <input type="checkbox"/> | <input type="checkbox"/>                                     | <input type="checkbox"/> |
| Cassava      | <input type="checkbox"/> | <input type="checkbox"/> | <input type="checkbox"/>                                                          | <input type="checkbox"/> | <input type="checkbox"/> | <input type="checkbox"/> | <input type="checkbox"/> | <input type="checkbox"/>                                     | <input type="checkbox"/> |
| Soybean      | <input type="checkbox"/> | <input type="checkbox"/> | <input type="checkbox"/>                                                          | <input type="checkbox"/> | <input type="checkbox"/> | <input type="checkbox"/> | <input type="checkbox"/> | <input type="checkbox"/>                                     | <input type="checkbox"/> |
| Mango        | <input type="checkbox"/> | <input type="checkbox"/> | <input type="checkbox"/>                                                          | <input type="checkbox"/> | <input type="checkbox"/> | <input type="checkbox"/> | <input type="checkbox"/> | <input type="checkbox"/>                                     | <input type="checkbox"/> |
| Pawpaw       | <input type="checkbox"/> | <input type="checkbox"/> | <input type="checkbox"/>                                                          | <input type="checkbox"/> | <input type="checkbox"/> | <input type="checkbox"/> | <input type="checkbox"/> | <input type="checkbox"/>                                     | <input type="checkbox"/> |
| Plantain     | <input type="checkbox"/> | <input type="checkbox"/> | <input type="checkbox"/>                                                          | <input type="checkbox"/> | <input type="checkbox"/> | <input type="checkbox"/> | <input type="checkbox"/> | <input type="checkbox"/>                                     | <input type="checkbox"/> |
| Coconut      | <input type="checkbox"/> | <input type="checkbox"/> | <input type="checkbox"/>                                                          | <input type="checkbox"/> | <input type="checkbox"/> | <input type="checkbox"/> | <input type="checkbox"/> | <input type="checkbox"/>                                     | <input type="checkbox"/> |
| Wheat        | <input type="checkbox"/> | <input type="checkbox"/> | <input type="checkbox"/>                                                          | <input type="checkbox"/> | <input type="checkbox"/> | <input type="checkbox"/> | <input type="checkbox"/> | <input type="checkbox"/>                                     | <input type="checkbox"/> |
| Sweet potato | <input type="checkbox"/> | <input type="checkbox"/> | <input type="checkbox"/>                                                          | <input type="checkbox"/> | <input type="checkbox"/> | <input type="checkbox"/> | <input type="checkbox"/> | <input type="checkbox"/>                                     | <input type="checkbox"/> |
| Potato       | <input type="checkbox"/> | <input type="checkbox"/> | <input type="checkbox"/>                                                          | <input type="checkbox"/> | <input type="checkbox"/> | <input type="checkbox"/> | <input type="checkbox"/> | <input type="checkbox"/>                                     | <input type="checkbox"/> |
| Sorghum      | <input type="checkbox"/> | <input type="checkbox"/> | <input type="checkbox"/>                                                          | <input type="checkbox"/> | <input type="checkbox"/> | <input type="checkbox"/> | <input type="checkbox"/> | <input type="checkbox"/>                                     | <input type="checkbox"/> |
| Millet       | <input type="checkbox"/> | <input type="checkbox"/> | <input type="checkbox"/>                                                          | <input type="checkbox"/> | <input type="checkbox"/> | <input type="checkbox"/> | <input type="checkbox"/> | <input type="checkbox"/>                                     | <input type="checkbox"/> |
| Carrot       | <input type="checkbox"/> | <input type="checkbox"/> | <input type="checkbox"/>                                                          | <input type="checkbox"/> | <input type="checkbox"/> | <input type="checkbox"/> | <input type="checkbox"/> | <input type="checkbox"/>                                     | <input type="checkbox"/> |
| Avocado      | <input type="checkbox"/> | <input type="checkbox"/> | <input type="checkbox"/>                                                          | <input type="checkbox"/> | <input type="checkbox"/> | <input type="checkbox"/> | <input type="checkbox"/> | <input type="checkbox"/>                                     | <input type="checkbox"/> |
| Beans        | <input type="checkbox"/> | <input type="checkbox"/> | <input type="checkbox"/>                                                          | <input type="checkbox"/> | <input type="checkbox"/> | <input type="checkbox"/> | <input type="checkbox"/> | <input type="checkbox"/>                                     | <input type="checkbox"/> |
| Tomato       | <input type="checkbox"/> | <input type="checkbox"/> | <input type="checkbox"/>                                                          | <input type="checkbox"/> | <input type="checkbox"/> | <input type="checkbox"/> | <input type="checkbox"/> | <input type="checkbox"/>                                     | <input type="checkbox"/> |
| Orange       | <input type="checkbox"/> | <input type="checkbox"/> | <input type="checkbox"/>                                                          | <input type="checkbox"/> | <input type="checkbox"/> | <input type="checkbox"/> | <input type="checkbox"/> | <input type="checkbox"/>                                     | <input type="checkbox"/> |
| Palm Nut     | <input type="checkbox"/> | <input type="checkbox"/> | <input type="checkbox"/>                                                          | <input type="checkbox"/> | <input type="checkbox"/> | <input type="checkbox"/> | <input type="checkbox"/> | <input type="checkbox"/>                                     | <input type="checkbox"/> |

| Food      | Any Reaction             |                          | How often does the child eat this food (in season)<br><i>Tick one column only</i> |                          |                          |                          |                          | Does the child avoid this food because it makes him/her ill? |                          |
|-----------|--------------------------|--------------------------|-----------------------------------------------------------------------------------|--------------------------|--------------------------|--------------------------|--------------------------|--------------------------------------------------------------|--------------------------|
|           | Yes                      | No                       | Most Days                                                                         | Most weeks               | Most months              | Rarely                   | Never                    | Yes                                                          | No                       |
| Corn      | <input type="checkbox"/> | <input type="checkbox"/> | <input type="checkbox"/>                                                          | <input type="checkbox"/> | <input type="checkbox"/> | <input type="checkbox"/> | <input type="checkbox"/> | <input type="checkbox"/>                                     | <input type="checkbox"/> |
| Melon     | <input type="checkbox"/> | <input type="checkbox"/> | <input type="checkbox"/>                                                          | <input type="checkbox"/> | <input type="checkbox"/> | <input type="checkbox"/> | <input type="checkbox"/> | <input type="checkbox"/>                                     | <input type="checkbox"/> |
| Rice      | <input type="checkbox"/> | <input type="checkbox"/> | <input type="checkbox"/>                                                          | <input type="checkbox"/> | <input type="checkbox"/> | <input type="checkbox"/> | <input type="checkbox"/> | <input type="checkbox"/>                                     | <input type="checkbox"/> |
| Water Yam | <input type="checkbox"/> | <input type="checkbox"/> | <input type="checkbox"/>                                                          | <input type="checkbox"/> | <input type="checkbox"/> | <input type="checkbox"/> | <input type="checkbox"/> | <input type="checkbox"/>                                     | <input type="checkbox"/> |
| Cocoyam   | <input type="checkbox"/> | <input type="checkbox"/> | <input type="checkbox"/>                                                          | <input type="checkbox"/> | <input type="checkbox"/> | <input type="checkbox"/> | <input type="checkbox"/> | <input type="checkbox"/>                                     | <input type="checkbox"/> |
| Kontomire | <input type="checkbox"/> | <input type="checkbox"/> | <input type="checkbox"/>                                                          | <input type="checkbox"/> | <input type="checkbox"/> | <input type="checkbox"/> | <input type="checkbox"/> | <input type="checkbox"/>                                     | <input type="checkbox"/> |
| Okro      | <input type="checkbox"/> | <input type="checkbox"/> | <input type="checkbox"/>                                                          | <input type="checkbox"/> | <input type="checkbox"/> | <input type="checkbox"/> | <input type="checkbox"/> | <input type="checkbox"/>                                     | <input type="checkbox"/> |
| Flour     | <input type="checkbox"/> | <input type="checkbox"/> | <input type="checkbox"/>                                                          | <input type="checkbox"/> | <input type="checkbox"/> | <input type="checkbox"/> | <input type="checkbox"/> | <input type="checkbox"/>                                     | <input type="checkbox"/> |
| Nutmeg    | <input type="checkbox"/> | <input type="checkbox"/> | <input type="checkbox"/>                                                          | <input type="checkbox"/> | <input type="checkbox"/> | <input type="checkbox"/> | <input type="checkbox"/> | <input type="checkbox"/>                                     | <input type="checkbox"/> |
| Other     | <input type="checkbox"/> | <input type="checkbox"/> | <input type="checkbox"/>                                                          | <input type="checkbox"/> | <input type="checkbox"/> | <input type="checkbox"/> | <input type="checkbox"/> | <input type="checkbox"/>                                     | <input type="checkbox"/> |

## G. Early Life factors

For the following questions please ask to see the child's weighing card.

Is the child's weighing card available? ☐ Yes ☐ No

1. Was your child born prematurely? ☐ Yes ☐ No

2. If Yes, how many months premature? \_\_\_\_\_ (in months)

3. What was your child's weight at birth? \_\_\_\_\_ kg Date Recorded \_\_\_\_/\_\_\_\_/\_\_\_\_

4. After birth, when did your child START breastfeeding:

☐ After Hours ☐ After Days ☐ After Weeks

5. For how long was your child breast-fed? Duration \_\_\_\_\_ (in months)

6. For how long was your child fed with ONLY breast-milk? Duration \_\_\_\_\_ (in months)

7. What was the first food OTHER than breast-milk given to your child?

Food \_\_\_\_\_ at what age? \_\_\_\_\_ (in months)

8. Was your child breast-fed by anyone OTHER than his or her mother at any point?

☐ Yes ☐ No

9. What were the reasons that your child was stopped breastfeeding?

Please state these reasons:

---

---

---

10. Did your child receive the following immunizations: (Please Verify with Child'

Immunization Record)

|                                    | No                       | Yes                      | Not Sure                 |
|------------------------------------|--------------------------|--------------------------|--------------------------|
| Oral Polio Vaccine (OPV)           | <input type="checkbox"/> | <input type="checkbox"/> | <input type="checkbox"/> |
| Bacillus Calmette Guérin (BCG)     | <input type="checkbox"/> | <input type="checkbox"/> | <input type="checkbox"/> |
| Diphtheria Pertussis Tetanus (DPT) | <input type="checkbox"/> | <input type="checkbox"/> | <input type="checkbox"/> |
| Yellow Fever                       | <input type="checkbox"/> | <input type="checkbox"/> | <input type="checkbox"/> |
| Measles                            | <input type="checkbox"/> | <input type="checkbox"/> | <input type="checkbox"/> |
| Other Immunizations, please state: |                          |                          |                          |

---

11. In your child's first 2 years of life, were you told by a health worker such as a doctor or nurse that your child suffered from any of the following? :

|                                                          | No                       | Yes                      | Cannot Recall            |
|----------------------------------------------------------|--------------------------|--------------------------|--------------------------|
| Respiratory infection such as Pneumonia or Bronchiolitis | <input type="checkbox"/> | <input type="checkbox"/> | <input type="checkbox"/> |
| Bacterial Meningitis                                     | <input type="checkbox"/> | <input type="checkbox"/> | <input type="checkbox"/> |
| Worm infection                                           | <input type="checkbox"/> | <input type="checkbox"/> | <input type="checkbox"/> |
| Measles                                                  | <input type="checkbox"/> | <input type="checkbox"/> | <input type="checkbox"/> |
| German Measles (Rubella)                                 | <input type="checkbox"/> | <input type="checkbox"/> | <input type="checkbox"/> |
| Hepatitis A                                              | <input type="checkbox"/> | <input type="checkbox"/> | <input type="checkbox"/> |

Other Diseases/Infections, please state:

---



---



---

12. In your child's first 2 years of life, did he or she attend a crèche or nursery?

[ ] Yes

[ ] No
