# Supplementary material
Source: publisher figshare collection journal article supplement (https://karger.figshare.com/articles/dataset/_/5121310)
Supplement: Supplementary file 1 [file 1 › 000318704_sm_Table.pdf]

**Table S1:** Associations of lifestyle factors with positive SPT for food.

|                                                   |     | Controls  | Cases     | Crude OR<br>(95% CI) | Adjusted OR<br>(95% CI) |
|---------------------------------------------------|-----|-----------|-----------|----------------------|-------------------------|
| Premature birth                                   | no  | 57(98.3%) | 32(94.1%) | 1                    | 1                       |
|                                                   | yes | 1(1.7%)   | 2(5.9)    | 3.6 (0.3 to 40.8)    | 2.4 (0.1 to 71.6)       |
| Exclusive breastfeeding for at least 3 months     | no  | 25(39.1%) | 10(29.4%) | 1                    | 1                       |
|                                                   | yes | 39(61.9%) | 24(70.6%) | 1.5 (0.6 to 3.8)     | 1.7 (0.4 to 6.5)        |
| Day care attendance during 2 first years of life  | no  | 47(77.0%) | 22(62.9%) | 1                    | 1                       |
|                                                   | yes | 14(23.0%) | 13(37.1%) | 2.0 (0.8 to 4.9)     | 1.6 (0.4 to 1.0)        |
| Food expenditure on food per month (above median) | no  | 27(28.2%) | 17(53.1%) | 1                    |                         |
|                                                   | yes | 29(51.8%) | 15(46.9%) | 0.82 (0.3 to 2.0)    | 0.54 (0.2 to 1.8)       |
| Any helminth infection <sup>#</sup>               | no  | 55(76.4%) | 27(77.1%) | 1                    |                         |
|                                                   | yes | 17(23.6%) | 8(22.9%)  | 0.96 (0.4 to 2.5)    | 0.85 (0.2 to 3.5)       |
| Malaria infection                                 | no  | 66(79.5%) | 33(78.6%) | 1                    | 1                       |
|                                                   | yes | 17(20.5%) | 9(21.4%)  | 1.06 (0.4 to 2.6)    | 0.8 (0.2 to 3.5)        |
| BMI below normal                                  | no  | 64(77.1%) | 35(81.4%) | 1                    | 1                       |
|                                                   | yes | 19(22.9%) | 8(18.6%)  | 0.77 (0.3 to 1.9)    | 0.34 (0.1 to 1.9)       |

*Adjusted odd ratios are corrected for age, and all other variables,*

*<sup>#</sup>Infection with any of the helminths *S. haematobium*, *trichuris*, *ascaris* or hookworm. <sup>\$</sup>Weight categories as described in Hogewoning AA et al, *Br J Dermatol.* 2009;161(2):475-7. Odds ratios with  $p < 0.05$  are in bold.*
